# Supplementary material for: A meta-analysis of randomized controlled trials: Efficacy of selenium treatment for sepsis
Source: PubMed Central journal article supplement — Medicine (Baltimore). 2019 Mar 1;98(9):e14733. doi: 10.1097/MD.0000000000014733 (PMC6831114; doi:10.1097/md.0000000000014733), 2019-03-01

Supplementary Figure S1

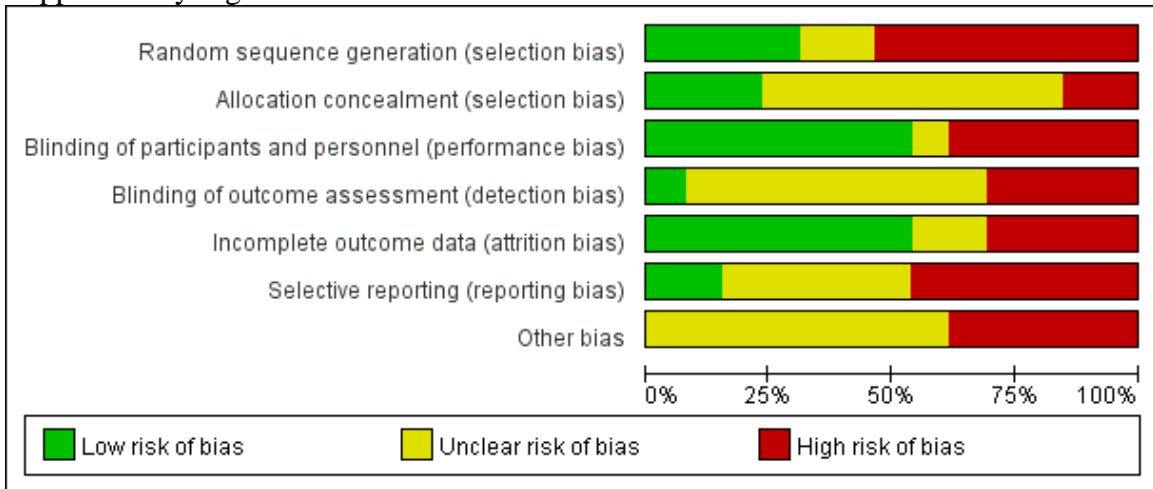

Supplementary Figure S2

|                 | Random sequence generation (selection bias) | Allocation concealment (selection bias) | Blinding of participants and personnel (performance bias) | Blinding of outcome assessment (detection bias) | Incomplete outcome data (attrition bias) | Selective reporting (reporting bias) | Other bias |
|-----------------|---------------------------------------------|-----------------------------------------|-----------------------------------------------------------|-------------------------------------------------|------------------------------------------|--------------------------------------|------------|
| Andrews 2011    | +                                           | +                                       | +                                                         | +                                               | +                                        | ?                                    | ?          |
| Angstwurm 1999  | ?                                           | ?                                       | -                                                         | ?                                               | ?                                        | -                                    | ?          |
| Angstwurm 2007  | -                                           | ?                                       | +                                                         | ?                                               | +                                        | -                                    | -          |
| Bloos 2016      | +                                           | +                                       | -                                                         | -                                               | -                                        | ?                                    | ?          |
| Chelkeba 2015   | -                                           | ?                                       | +                                                         | ?                                               | +                                        | +                                    | -          |
| Chelkeba 2017   | +                                           | ?                                       | +                                                         | -                                               | +                                        | ?                                    | ?          |
| Forceville 2007 | -                                           | ?                                       | +                                                         | ?                                               | +                                        | +                                    | -          |
| Manzanares 2011 | -                                           | ?                                       | -                                                         | ?                                               | +                                        | -                                    | ?          |
| Mishra 2007     | -                                           | ?                                       | +                                                         | ?                                               | -                                        | -                                    | -          |
| Montoya 2009    | -                                           | +                                       | +                                                         | ?                                               | -                                        | -                                    | -          |
| Valenta 2011    | -                                           | -                                       | -                                                         | -                                               | -                                        | -                                    | ?          |
| Woth 2014       | +                                           | -                                       | -                                                         | -                                               | +                                        | ?                                    | ?          |
| Zimmermann 1997 | ?                                           | ?                                       | ?                                                         | ?                                               | ?                                        | ?                                    | ?          |

### Supplementary Figure S3

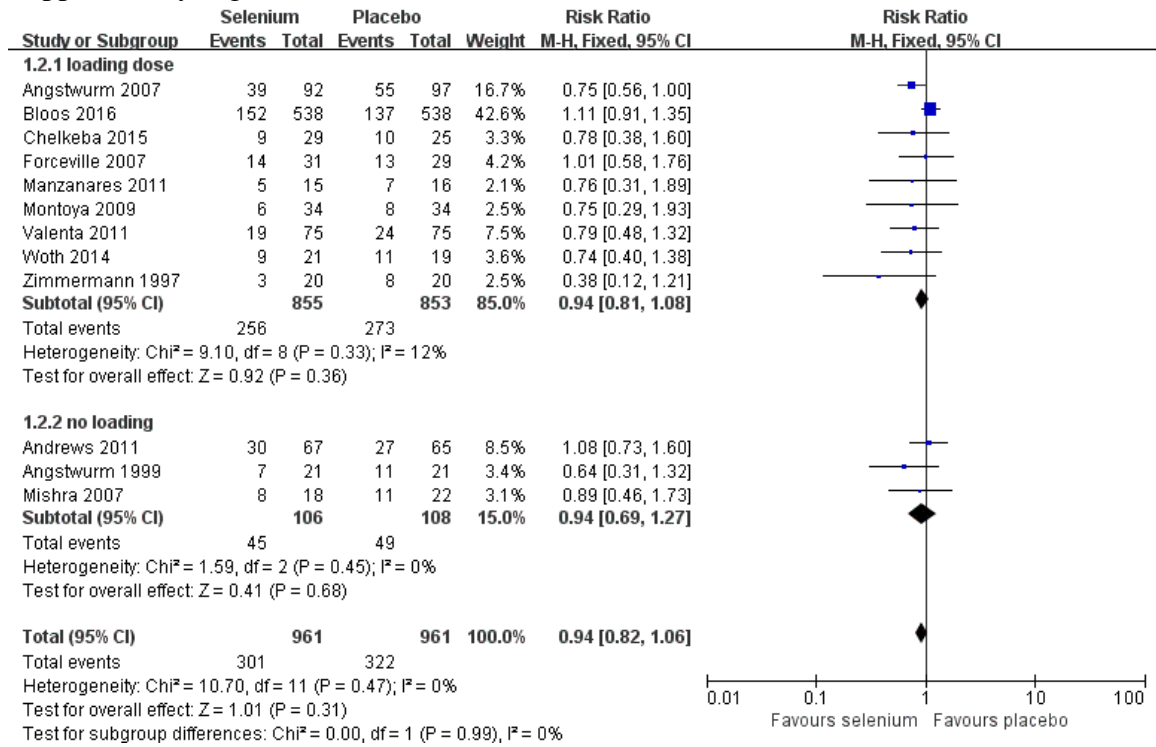

### Supplementary Figure S4

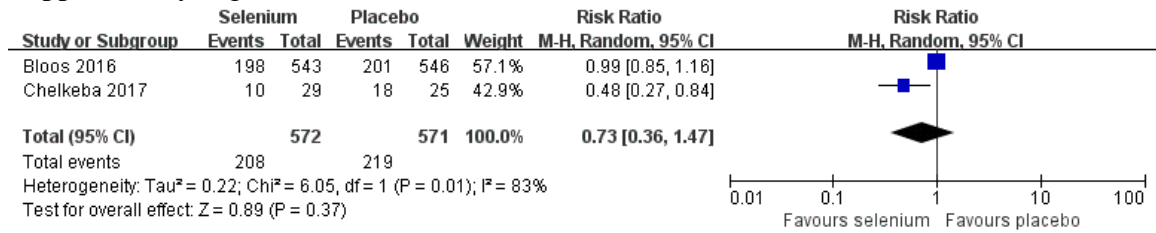

### Supplementary Figure S5

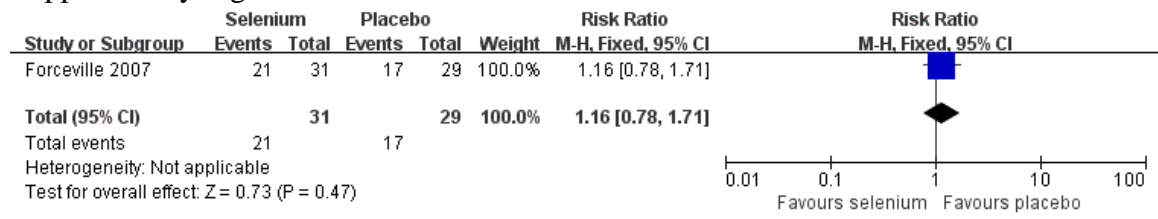

### Supplementary Figure S6

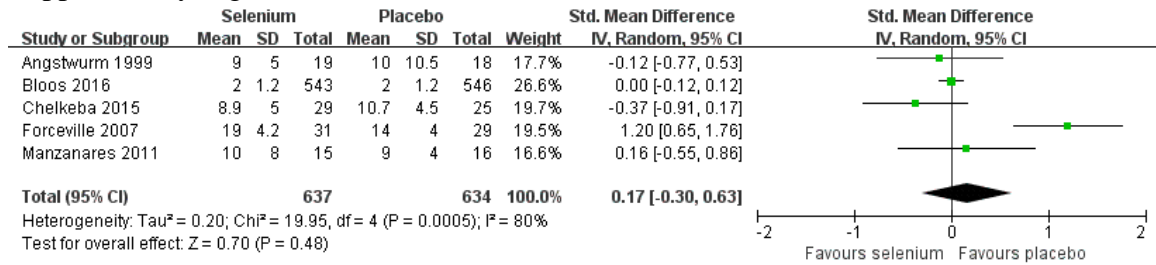

### Supplementary Figure S7

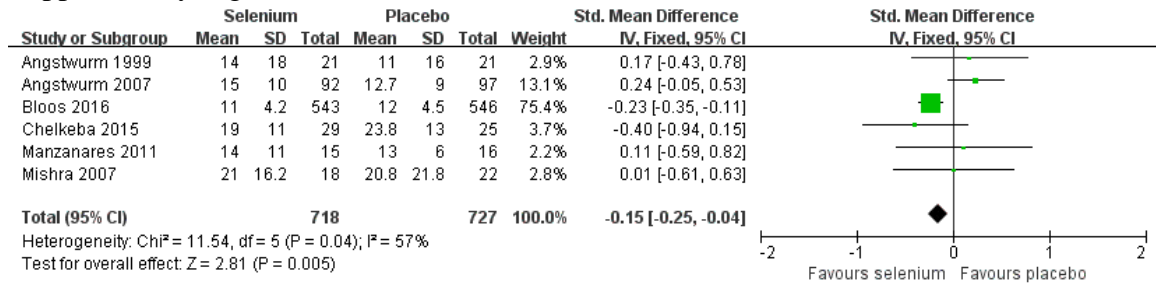

### Supplementary Figure S8

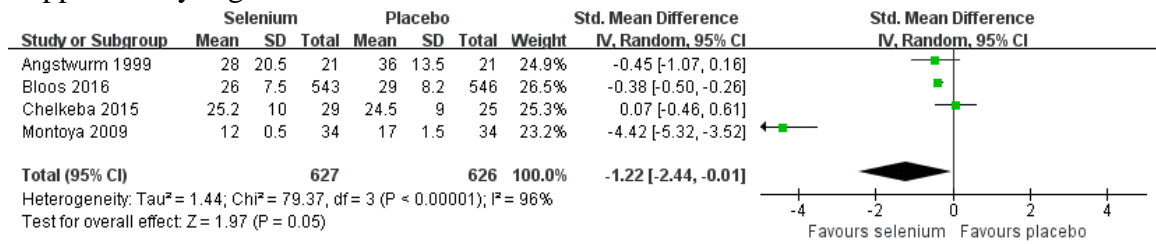



### Supplementary Figure S9

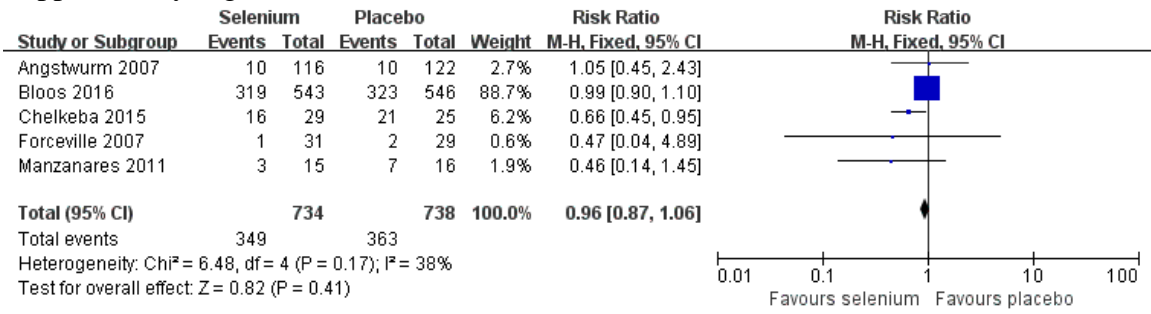

### Supplementary Figure S10

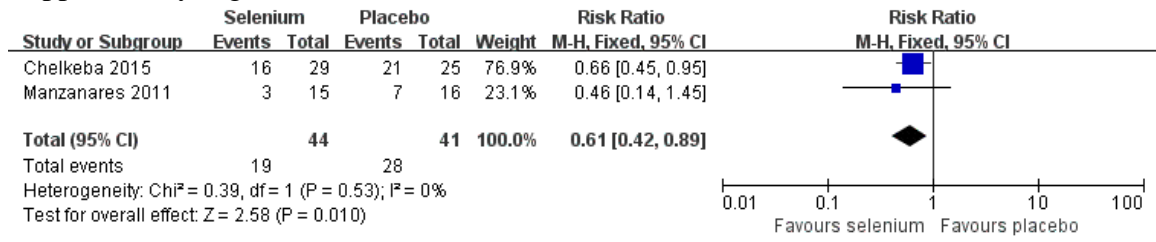

## Supplementary Figure S11

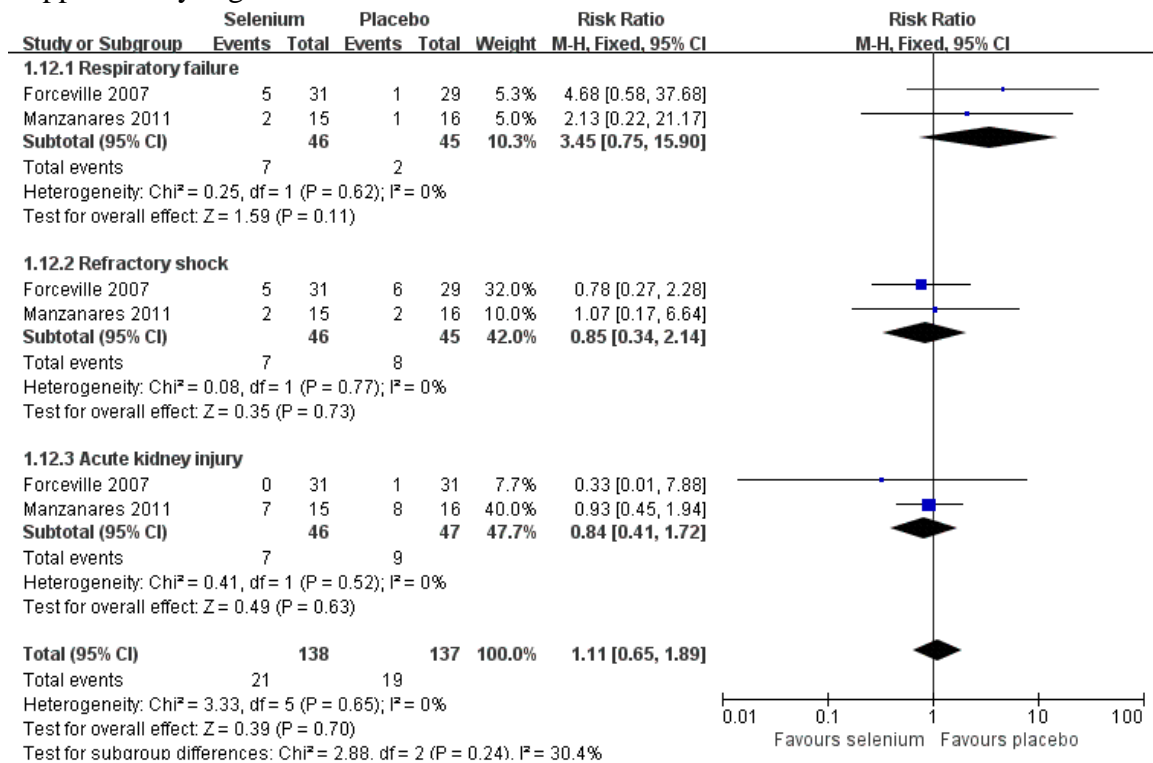

## Supplementary Figure S12

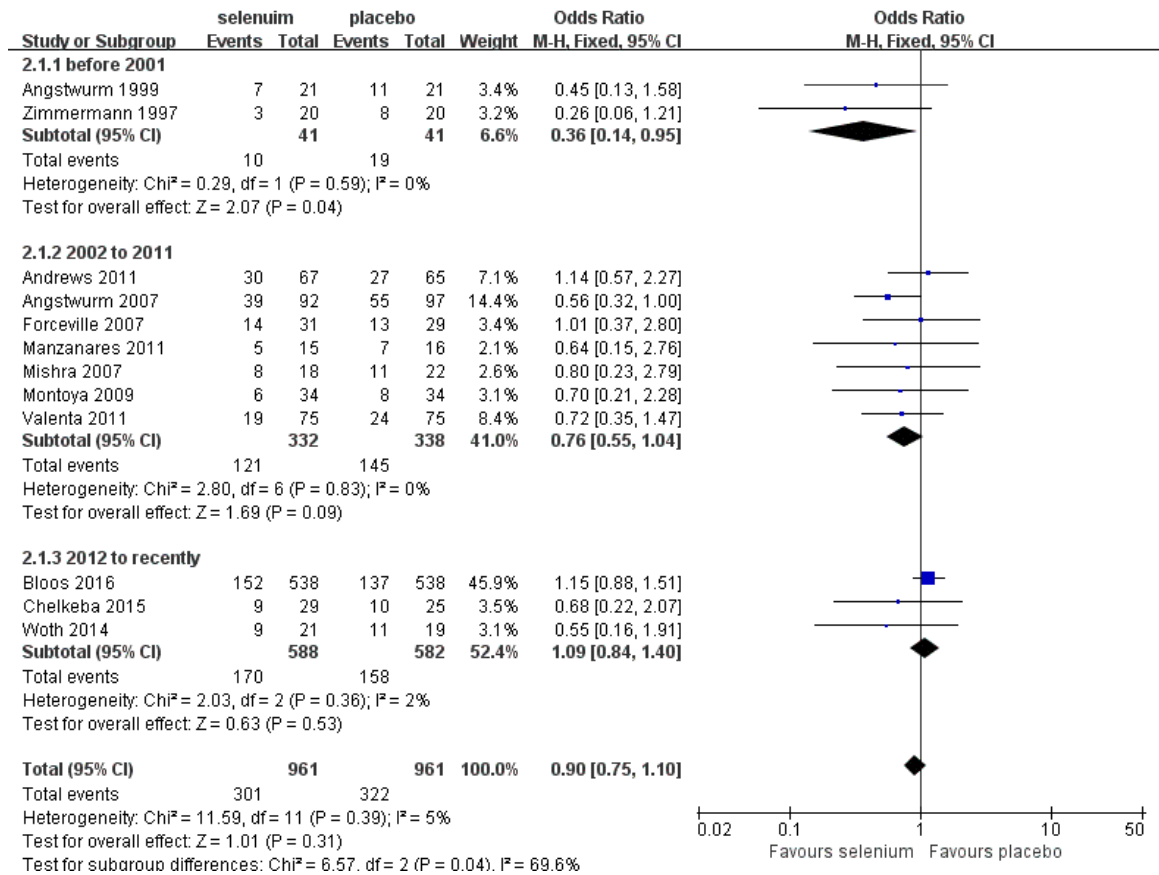

Supplementary Figure S13

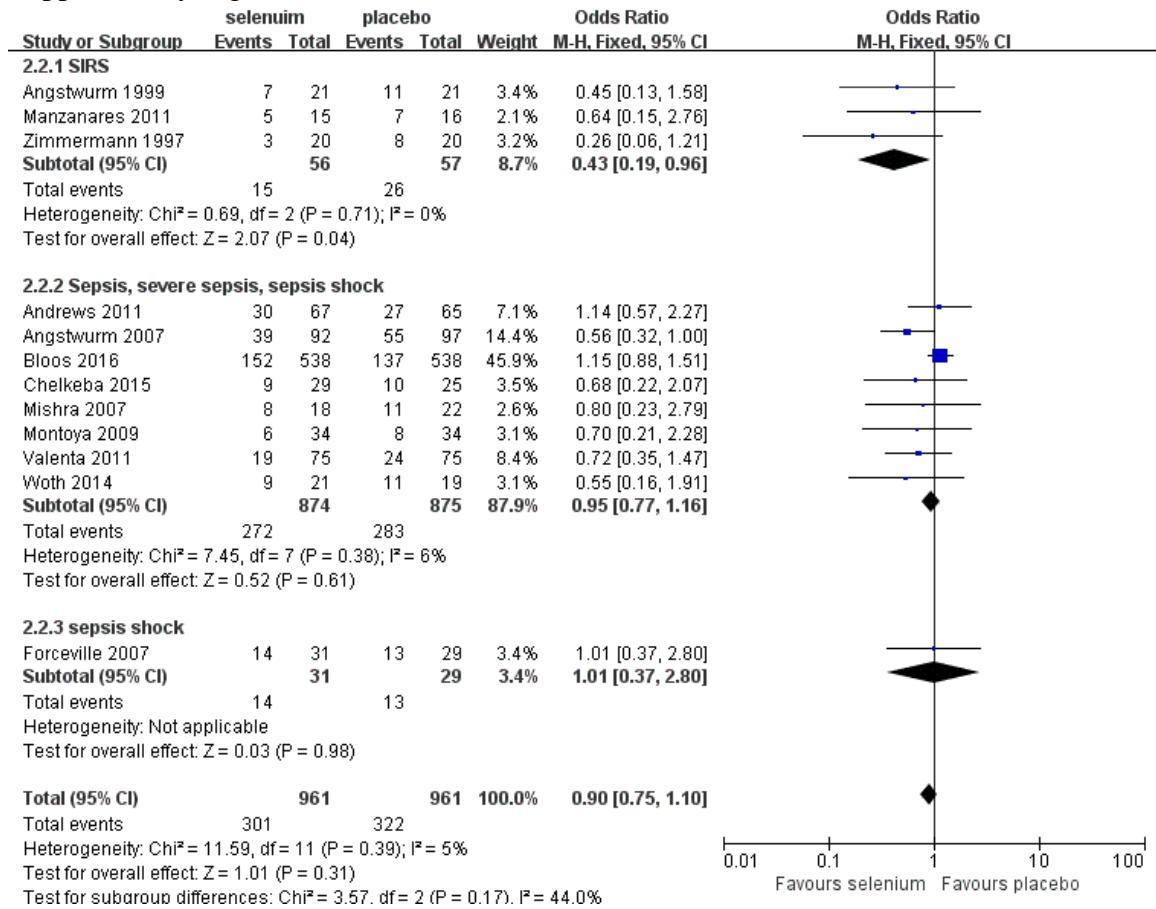

## Supplementary Figure S14

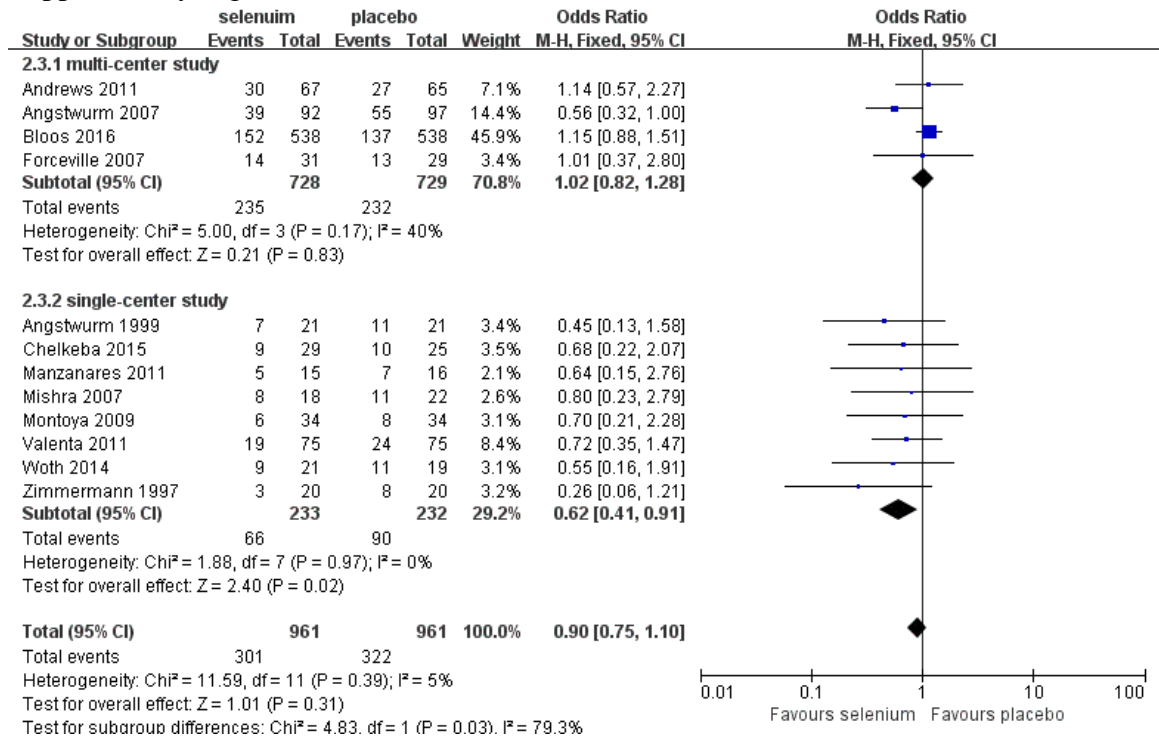

Supplement: medi-98-e14733-s001.pdf [file medi-98-e14733-s001.pdf]
